# Supplementary material for: Identification of Altered Metabolic Pathways in Plasma and CSF in Mild Cognitive Impairment and Alzheimer’s Disease Using Metabolomics
Source: PLoS One. 2013 May 20;8(5):e63644. doi: 10.1371/journal.pone.0063644 (PMC3658985; doi:10.1371/journal.pone.0063644)
Supplement: Table S2 — Altered metabolites in CSF in AD, MCI and CN patients. Data was generated using 1 way ANOVA (p<0.05). FC – fold change between indicated groups; MCI – mild cognitive impairment; AD – Alzheimer’s Disease; CN – cognitively normal. Metabolites detected and identified in all three study groups are highlighted in bold font. Compound identification codes: CAS- Chemical Abstracts Service; KEGG- Kyoto Encyclopedia of Genes and Genomes; HMP- Human Metabolome Project; LMP ID- nonpolar lipid metabolite IDs. (XLSX) [file pone.0063644.s002.xlsx]

## Sheet: Sheet1
Supplementary Table 2. Altered metabolites in CSF in AD, MCI and CN groups.
Compound	p (Corr)	FC ([AD] vs [MCI])	FC ([AD] vs [N])	FC ([MCI] vs [N])	CAS Number	HMP ID	KEGG ID	LMP ID	Mass	Retention Time	Ionization Mode
Acetoacetic acid	0.0306188	-1.05853	1.13549	1.20196	541-50-4	HMDB00060	C00164	LMFA01060003	102.032	0.927805	C18+
Deoxyadenosine	0	-9.95977	-101.53	-10.194	958-09-8	HMDB00101	C00559		251.104	2.07105	HILIC+
Fumaric acid	0.000870234	-1.72178	-3.56043	-2.06788	110-17-8	HMDB00134	C00122		116.01	1.00541	HILIC-
Proline	0.0175766	32.2957	3.70948	-8.70624	147-85-3	HMDB00162	C00148		137.044	0.860644	C18+
Pyruvic acid	0.000733317	-7.2842	49.892	363.424	127-17-3	HMDB00243	C00022	LMFA01060077	88.0161	1.12703	C18-
Pyroglutamic acid	0.04242	-1.40376	-2.29331	-1.63369	98-79-3	HMDB00267	C01879		129.042	6.85794	HILIC+
2-Methylbutyrylglycine	0.0277331	-10.0215	-3.35237	2.98939	52320-67-9	HMDB00339			159.089	6.56621	HILIC+
2-Methyl-3-ketovaleric acid	0.0234521	-1.16219	1.22888	1.42819	14925-93-0	HMDB00408			130.062	3.74124	C18-
2-Furoic acid	0.0471398	-3.35622	13.5361	45.43	88-14-2	HMDB00617	C01546		112.015	1.04007	C18-
N-Acetyl-a-neuraminic acid	0.0262977	-2.42685	7.859	19.0726	21646-00-4	HMDB00773			309.108	0.915407	C18+
Dehydroascorbic acid	0.038116	2.07165	2.28325	1.10214	490-83-5	HMDB01264	C00425		174.016	2.95019	HILIC-
5-(hydroxymethyl)- 2-Furancarboxylic acid	0.0155187	-1.50077	62.9346	94.4507	6338-41-6	HMDB02432			142.025	1.18271	C18+
Testosterone sulfate	0.0109657	1.95594	-1.20024	-2.3476	651-45-6	HMDB02833	C00535		368.163	0.722293	HILIC-
Lactaldehyde	0.0472883	-1.05093	-1.16054	-1.1043	598-35-6	HMDB03052	C00424		74.0365	1.39526	HILIC-
Diacetyl	0.014238	-2.13732	18.6379	39.8351	431-03-8	HMDB03407	C00741		86.0361	1.00016	C18-
Diethanolamine	0.0118999	1.01386	7.88028	7.77254	111-42-2	HMDB04437	C06772		105.079	0.956318	C18+
Methylglyoxal	0.000973292	1.22054	-1.62077	-1.97821	78-98-8		C00546		72.0208	1.00745	HILIC-
Ne-Methyl-L-lysine	0.0324246	1.28237	5.74659	4.48121	7622-29-9		C02728		182.105	2.87762	HILIC+
Lecanoric acid	0.0403999	1.0508	1.30028	1.23743	480-56-8		C02868	LMPK02000008	318.072	2.44127	HILIC-
(S)-2-Hydroxyglutarate	0.0366633	2.60795	-15.7613	-41.1047	13095-48-2		C03196		148.036	1.87711	C18-
4-Hydroxy-L-threonine	0.0282469	-2.61241	-24.133	-9.23782	21768-45-6		C06056		135.053	1.26677	C18+
Acetazolamide	0.000215787	2.83965	-44.8103	-127.245	59-66-5		C06805		221.989	0.887107	C18-
Isoniazid	0.0373397	-2.12714	-4.35052	-2.04525	54-85-3		C07054		137.058	1.29366	HILIC+
Pyrimethamine	0.0137798	-3.18757	-1.69043	1.88565	58-14-0		C07391		248.082	1.96478	HILIC-
Pirenzepine	0.00261996	2.25104	-1.17737	-2.65031	28797-61-7		C07508		351.171	0.715264	HILIC-
ETHOPROPAZINE	0.012738	-10.2253	13.531	138.359	1094-08-2		D03276		312.169	1.1095	HILIC-
L-Aspartic acid b-semialdehyde	0.029495	4.67403	-2.57806	-12.0499	2338-03-6.				117.042	1.10861	C18-
COTARNINE	0	-4.95334	-78.2255	-15.7925	10018-19-6				237.1	1.96824	HILIC-
8-Amino Caprylic acid	0.0463604	1.34383	1.4529	1.08117	1002-57-9				159.126	1.23556	C18+
Bis (2-hydroxypropyl) amine	0.0111451	-1.13796	-1.27762	-1.12273	110-97-4				133.11	4.87221	HILIC+
Allocortol	0.0277331	1.97692	10.9758	5.55195	1169-36-4				368.257	1.15188	HILIC+
diethyltoluamide	0.0237739	2.66867	-11.4436	-30.5393	134-62-3				191.131	8.17893	C18+
20alpha-Dihydroprednisolone	0.0444075	1.1425	-1.67198	-1.91024	15847-24-2				362.212	2.0537	HILIC+
Gualenate (Sodium Gualenate)	0.0130196	3.50521	-2.34089	-8.20532	16915-32-5				278.097	1.94979	HILIC-
PYROGALLIN	0.0227346	13.8597	-3.98045	-55.1678	18483-80-2				204.042	0.955841	C18-
N,N-Didemethylchlorpromazine	0.0416262	18.3002	-2.70678	-49.5345	2095-17-2				290.063	2.92953	HILIC+
MYCOPHENOLIC ACID	0.0197873	1.63398	-10.5323	-17.2095	24280-93-1				320.125	5.24451	C18+
TUBAIC ACID	0.0291075	-1.01314	1.52351	1.54352	25277-45-6				220.074	1.96088	HILIC-
AMBELLINE	0.0350919	-21.3941	-21.5879	-1.00906	3660-62-6				331.144	2.06794	HILIC+
7alpha-(Thiomethyl)spironolactone	0.0131051	3.0869	38.73	12.5466	38753-77-4				388.207	5.81147	C18+
L-Glutamic acid dibutyl ester	0.0277331	-1.52497	4.98933	7.60857	4261-76-1				259.178	6.38786	HILIC+
BERGENIN	0.0350919	-2.96392	-5.13563	-1.73272	477-90-7				328.08	2.07197	HILIC+
CITROPTEN	0.0309118	-1.00325	-1.64237	-1.63705	487-06-9				206.059	2.34727	HILIC-
O-Desmethylnaproxen	0.0113381	-1.60002	-2.01571	-1.2598	52079-10-4				216.08	1.39672	HILIC-
Embelin	0.0495386	2.08614	-1.23503	-2.57645	550-24-3				294.183	0.815335	HILIC-
Phenoperidine	0.0171577	1.04917	1.05273	1.0034	562-26-5				367.214	11.0301	C18+
Idebenone Metabolite (Benzenehexanoic acid, 2,5-dihydroxy-3,4-dimethoxy-6-methyl-) + 5.8371787	0.0118999	-6.86258	-79.5846	-11.5969	58185-92-5				298.142	5.83718	C18+
DIALLYL SULFIDE	0.00381057	22.1935	-2.83243	-62.8615	592-88-1				114.049	1.2401	C18+
4-Methylumbelliferyl beta-D-glucuronide	0.000418904	8.38045	-29.4536	-246.834	6160-80-1				352.079	0.899474	C18-
1,3-Glyceryl dinitrate	0.047723	-1.55923	2.91459	4.5445	623-87-0				242.037	2.83861	HILIC-
Glycolate	0.042292	5.9606	3.64937	-1.63332	666-14-8				76.016	1.97174	HILIC-
METHYL 7-DESHYDROXYPYROGALLIN-4-CARBOXYLATE	0.0291075	-3.95484	-38.8869	-9.83275	77-41-8				262.05	0.805915	HILIC-
Ethosuximide	0.0324246	2.96982	1.22455	-2.42523	77-67-8				141.079	1.57415	HILIC+
7-hydroxy Tetranor Iloprost	0.0291075	1.01734	-1.97257	-2.00677	93128-32-6				322.18	1.08735	HILIC-
Oxaloglutarate	0.0176446	-4.19207	-28.451	-6.78685			C05533		204.025	0.772911	C18+
Netilmicin	0.0330705	-1.5412	1.44518	2.22731					475.3	4.15053	HILIC+
Methoxsalen Metabolite	4.45982e-05	-1.7202	-14.9759	-8.70594					236.067	1.96618	HILIC-
Met Glu Lys	0.0469477	-1.05909	-1.10937	-1.04747					406.19	8.97651	C18-
Met Ala His	0.0416262	-1.13314	-1.61203	-1.42262					357.145	2.50426	HILIC+
Iridotrial glucoside	0.0274284	7.7384	34.9284	4.51364			C11653	LMPR01020125	344.145	5.72602	C18-
Imidazolone	0.000130092	-2.60947	-168.88	-64.7179		HMDB04363	C06195		84.0321	1.61419	C18-
GPEtn(18:1(11Z)/18:1(9Z))[U]	0.0244844	-3.46685	14.1533	49.0675				LMGP02010034	765.523	11.9807	C18+
EPICATECHIN PENTAACETATE	0.0170644	-1.78994	-13.6625	-7.63295					500.131	2.07001	HILIC+
dodecanamide	7.22771e-08	1.00459	-1.46847	-1.47521					199.193	1.13582	HILIC+
clavirin I	0.00820944	-4.27298	11.9704	51.1494				LMFA03120025	290.152	0.900338	C18+
a-hydroxybutyrate	0.0182525	-1.04221	-1.18807	-1.13996					104.047	1.39599	HILIC-
6,7-DICHLORO-3-HYDROXY-2-QUINOXALINECARBOXYLIC ACID	0.0296737	11.8214	20.9341	1.77087					257.96	0.775454	C18-
3alpha,6alpha,12alpha-Trihydroxy-7-oxo-5beta-cholan-24-oic Acid	0.00820944	1.047	1.62708	1.55404					422.268	5.67016	C18+
2-ISOPROPYL-3-METHOXYCINNAMIC ACID	0.0291075	6.7974	3.42275	-1.98595					220.109	1.05531	HILIC-
10-hydroxy-8E-Decene-2,4,6-triynoic acid	0.0198739	1.09955	-1.08244	-1.1902					176.048	8.96172	C18+
(R)-3-Methyl-2-oxobutanoate	0.00642248	2.61555	-9.99499	-26.1423		HMDB04260			175.062	3.76955	C18-
(24S)-1alpha,24-dihydroxy-22-oxavitamin D3 / (24S)-1alpha,24-dihydroxy-22-oxacholecalciferol + 2.8750935	0.0425624	-1.01311	-1.38902	-1.37104				LMST03020058	418.308	2.87509	HILIC+
(22R)-1alpha,22,25-trihydroxy-23,24-tetradehydro-24a,24b-dihomo-20-epivitamin D3 / (22R)-1alpha,22,2	0.0313977	4.61461	1.26406	-3.65062				LMST03020399	456.322	1.02591	HILIC-
(22E,24E)-1alpha,25-dihydroxy-22,23,24,24a-tetradehydro-24a-homovitamin D3 / (22E,24E)-1alpha,25-dih	0.0309118	-1.3203	-1.2488	1.05725				LMST03020314	426.312	1.00707	HILIC-
C9 H9 N5 O3	0.00073373	-1.48467	53.9386	80.0813					235.071	0.944711	C18-
C9 H6	0.0286222	-39.2656	-2.32187	16.9112					114.047	1.2418	C18+
C9 H6 N2 O3	0.0223573	38.3606	2.44292	-15.7028					190.035	0.969121	C18-
C9 H5 Cl S2	0.0306188	1.19725	1.24455	1.0395					211.95	0.776181	C18+
C9 H20 N6 O6 S	0.0459259	-1.08953	-1.43813	-1.31996					340.117	2.50125	HILIC-
C9 H20 Cl2 N12 O3	0.00109787	-1.59672	-2.01902	-1.26448					414.115	2.04869	HILIC+
C9 H19 Cl2 N11 O	0.00843662	-1.09437	-1.43477	-1.31105					367.115	2.64693	HILIC-
C9 H19 Cl O3 S	0.0271514	-6.15239	4.75429	29.2502					242.075	3.91962	C18-
C9 H14 N2 O3	0.0485734	-1.14867	2.69678	3.09772					198.1	1.49337	HILIC+
C9 H14 Cl N5 O3	0.0412017	17.543	5.33606	-3.28763					275.078	1.10013	C18-
C9 H11 Cl2 N7 S	0.0035524	1.21002	-1.02814	-1.24408					319.017	2.35337	HILIC-
C8 H8 Cl N7 O2	0.0412574	-3.59537	-22.5044	-6.25929					269.043	1.95921	HILIC-
C8 H7 N O2 S2	0.0408115	5.72168	24.8971	4.35137					212.992	0.775534	C18+
C8 H4 O3	0.00116478	1.08277	-1.10427	-1.19567					148.016	8.96135	C18+
C8 H22 N6 O	0.000102956	2.65842	-1.29174	-3.43398					218.188	1.05442	HILIC+
C8 H20 N2 O3	0.0119057	-1.01946	13.7117	13.9785					192.147	0.934574	C18+
C8 H19 N5 O S	0.0350919	1.67555	-1.34479	-2.25325					233.13	1.13296	HILIC+
C8 H18 O3	0.0350919	-1.11885	-1.45103	-1.2969					162.125	1.17738	HILIC+
C8 H16 N8 O2	0.0147252	-9.88422	2.23644	22.1055					256.14	0.913835	C18+
C8 H14 Cl N3 O3	4.31458e-05	1.50496	-5.05087	-7.60135					235.072	1.96514	HILIC-
C8 H12 Cl N3 O - 3.0550938	0.0204352	1.17403	-28.6019	-33.5794					201.068	3.05509	HILIC-
C7 H4 Cl2 O2 S5	0.0485959	-1.03632	-1.05356	-1.01664					349.821	0.839123	C18-
C7 H16 O10	0	-2.082	-97.5399	-46.849					260.076	1.963	HILIC-
C7 H16 Cl2 N2 S5	0.00230709	18.918	18.535	-1.02066					357.93	0.793268	C18-
C7 H15 N O3	0.0118999	-1.11938	1.13001	1.26491					161.106	0.92856	C18+
C7 H14 N6 S2	6.62791e-05	1.87237	-1.0984	-2.05662					246.071	1.96201	HILIC-
C7 H11 N5 O2	0.0397068	-1.4765	-102.087	-69.1411					197.091	0.892255	C18+
C7 H10 N2 O2	0.0495039	1.00046	1.04107	1.04059					154.072	3.23447	C18-
C7 H10 Cl N3 O2	0.000973292	-12.5714	-126.883	-10.093					203.045	1.96808	HILIC-
C7 H Cl O4	0.0291075	-3.37369	-1.4579	2.31408					183.958	2.40544	HILIC-
C6 H9 N O	0.0387419	-1.07318	2.65543	2.84976					111.066	1.44014	HILIC+
C6 H9 Cl O3 S	0.0482546	1.1221	1.34944	1.2026					195.996	0.869889	HILIC-
C6 H8 N2	5.85204e-05	1.01858	1.05309	1.03388					108.067	3.23589	C18+
C6 H8 N2 O	0.0397068	6.28363	-5.62708	-35.3585					124.064	1.03104	C18+
C6 H8 Cl2 N4 O S	0.0373397	-1.3443	-2.37688	-1.76811					253.979	5.48858	HILIC+
C6 H6 O	0.00137981	-1.29734	1.09547	1.42119					94.0407	0.761853	HILIC-
C6 H6 N4 O	0.0458448	1.0594	1.78465	1.68458					150.056	2.4431	HILIC+
C6 H2 N2 O7	0.00136003	1.03482	1.08986	1.05319					213.986	4.89589	C18-
C6 H2 N2 O S	0.00381057	2.19603	-25.0595	-55.0315					149.991	0.953086	C18+
C6 H15 N O	0.0350919	2.10695	-1.31966	-2.78045					117.116	4.95443	HILIC+
C6 H14 O3	0.0119354	1.19755	-1.22673	-1.46907					134.093	3.91876	C18+
C6 H13 N O3	0.033231	-1.15247	1.12994	1.30222					147.089	1.22722	C18+
C6 H12 N8	0.0233421	-3.00082	4.47658	13.4334					196.12	1.26605	HILIC+
C6 H11 N O S	0.0416262	3.00036	9.19107	3.06332					145.056	1.49273	HILIC+
C6 H11 Cl3 O2 S	0.00344561	5.62317	-7.00318	-39.3801					251.956	0.902182	C18-
C6 H10 N6 O4	0.00985911	-1.84786	-2.13145	-1.15347					230.077	1.3954	HILIC-
C51 H61 N O	0.00311096	-1.21837	-1.99734	-1.63936					703.475	0.993642	HILIC+
C5 H9 N5 O S	0.0094388	4.60149	1.30716	-3.52021					187.052	3.15312	HILIC-
C5 H9 Cl N2 O	0.0315205	3.86731	-8.92592	-34.5193					148.041	0.9016	C18-
C5 H8 O2 S	0.00360801	18.8557	-13.5722	-255.913					132.025	1.24755	C18+
C5 H8 Cl2 N2 O2	1.50949e-05	1.75913	-96.4669	-169.697					197.994	0.930922	C18-
C5 H6 N2 O	0.0485734	3.40392	4.92369	1.44648					110.052	1.54323	HILIC+
C5 H6 Cl3 N O4 S4	0.00843662	1.23562	-19.834	-24.5073					376.824	0.89883	HILIC-
C5 H5 Cl S	0.00820944	-6.74417	15.6248	105.376					131.98	1.00508	C18+
C5 H2 N2 O5	0.00344561	1.08951	1.1702	1.07407					169.996	4.8957	C18-
C5 H2 Cl N3	0.0307668	1.19088	1.2297	1.03259					138.994	0.776693	C18+
C5 H11 N3 O8	0.0117472	21.076	-1.26345	-26.6286					241.055	1.30457	C18-
C5 H11 N O	0.0454133	-1.00101	1.28519	1.28648					101.083	2.05904	HILIC-
C5 H10 N4	0.047723	1.29318	3.72462	2.88021					126.093	2.37296	HILIC-
C44 H79 N S2	0.0444075	1.13435	-2.14877	-2.43746					685.564	1.08092	HILIC+
C44 H30 Cl N3 O3	3.84421e-10	2.83762	1.72079	-1.64902					683.199	0.989986	HILIC+
C40 H48 O3	0.0416262	1.13091	1.84339	1.63					576.361	6.42778	HILIC+
C40 H43 N3 O2	0.0094388	-8.75703	-22.5158	-2.57117					597.339	1.01451	HILIC-
C40 H10 N6 O3	0.00663311	-2.20981	-7.30955	-3.30778					622.08	1.62648	HILIC+
C4 H7 Cl2 N3 O S	0.014443	-10.5285	-9.29194	1.13308					214.969	4.49937	C18-
C4 H6 O7 S2	0.0223261	4.49696	23.8425	5.30192					229.955	5.19981	C18-
C4 H6 O4	0.0292719	24.3445	-1.1758	-28.6243					118.028	0.923242	C18-
C4 H6 O2 S	0.0492124	6.11209	25.5835	4.18572					118.008	1.04529	C18+
C4 H4 N2 O8	0.033231	1.28159	-18.7315	-24.0061					207.996	0.884513	C18+
C4 H3 N3 O2	0.0495039	1.14016	1.26563	1.11005					125.022	1.27706	C18-
C4 H11 N5 O4	0.0229388	1.00345	1.02937	1.02584					193.081	3.23654	C18+
C4 H11 Cl2 N3 O	0.00381057	2.53162	-11.1182	-28.1472					187.028	0.905249	C18+
C39 H69 N5 S	0.0352534	23.3306	-2.19742	-51.2673					639.528	13.9615	C18+
C39 H47 N3 O4	0.0468279	-2.1922	1.27778	2.80115					621.357	6.48485	HILIC+
C38 H79 N	0.0247598	1.74416	-2.32092	-4.04805					549.62	2.71718	HILIC+
C38 H58 N6 O4	0.00127696	-1.21313	-2.02575	-1.66985					662.45	0.994418	HILIC+
C37 H40 N2 O3 S2	0.00875038	-1.98011	-1.63406	1.21178					624.247	1.0658	HILIC+
C36 H51 N O S	0.0423878	-23.7963	-2.36837	10.0475					545.369	4.08983	HILIC+
C36 H43 N5 O2	0.0165957	-19.0097	-69.6623	-3.66457					577.344	6.41094	HILIC+
C36 H41 N3 O2	0.0141377	6.70653	35.1369	5.2392					547.319	5.48808	C18+
C34 H58 S2	0.0416262	-1.03455	-1.76347	-1.70458					530.402	1.0367	HILIC+
C34 H24 Cl N9 O	0.0324246	1.73783	1.47108	-1.18133					609.18	0.994363	HILIC+
C33 H57 N5 S	0.0433666	1.11871	1.27768	1.1421					555.434	12.619	C18+
C33 H51 N11 O2	0.042485	-1.13648	5.22411	5.93712					633.421	4.63429	HILIC+
C33 H24 Cl N S	0.00118564	-1.9886	-24.1436	-12.141					501.132	2.06825	HILIC+
C32 H8 N2	0.0476679	-2.08377	-7.94955	-3.81499					420.069	2.02595	HILIC+
C32 H45 N O S	0.0420603	-2.56766	-1.64023	1.56543					491.321	1.05368	HILIC+
C32 H36 Cl N O3 S	0.00254348	1.48945	-2.66472	-3.96897					549.212	0.990086	HILIC+
C32 H33 N5 O2 S	0.0223573	-1.68769	8.17237	13.7924					551.239	3.2342	C18-
C32 H30 N2 S3	0.0416262	2.69416	11.2854	4.18883					538.157	0.994129	HILIC+
C31 H60 O3 S3	0.0277331	14.4021	-1.62636	-23.4231					576.369	1.02991	HILIC+
C31 H51 N O2 S	0.0485734	2.54932	2.08417	-1.22319					501.365	1.33007	HILIC+
C31 H38 N2 O3	0.0487977	2.37674	18.9593	7.97704					486.286	1.06065	HILIC-
C31 H26 Cl N5 S	1.26895e-05	2.43292	-1.05773	-2.57337					535.161	0.9967	HILIC+
C30 H40 N2 O4 S2 - 2.1676435	0.0291075	2.65273	36.7047	13.8366					556.242	2.16764	HILIC-
C30 H34 N2	0.0277331	1.6711	8.84855	5.29504					422.272	5.5419	HILIC+
C3 H9 Cl N6 S2	0.0324507	-4.21934	5.70786	24.0834					228.003	1.04218	C18-
C3 H4 O4	0.0355798	1.88598	-31.6062	-59.6087					104.01	0.9284	C18-
C3 H4 N2 O4	0.0447449	1.72419	-15.0037	-25.8693					132.019	4.89536	C18-
C3 H4 N2 O2 S - 0.96635234	0.00893108	1.14696	1.15836	1.00994					131.999	0.966352	HILIC-
C3 H4 Cl3 N O S	0.00367263	1.34216	2.11678	1.57715					206.907	1.02022	HILIC-
C3 H14 Cl N7 O2	0.00552425	-3.58624	26.8559	96.3119					215.091	1.22676	C18+
C3 H Cl N2 O2	0.0320189	3.38671	79.1952	23.3841					131.974	0.772084	C18-
C29 H63 N7 O S	0.029353	2.99563	-1.04978	-3.14476					557.481	1.07605	HILIC+
C28 H52 N6 O3	0.0444075	1.86861	1.05683	-1.76813					520.41	1.06845	HILIC+
C28 H47 N5 O8	0	-34.7392	-49.1326	-1.41433					581.342	1.00472	HILIC-
C28 H32 N12 O3	0.0268798	1.74736	2.272	1.30025					584.274	1.62503	HILIC-
C27 H6 N2 S	0.026837	-1.88305	-4.77453	-2.53553					390.025	2.0644	HILIC-
C27 H29 N O	0.0106829	-1.08407	-1.25892	-1.16129					383.224	8.26483	C18-
C26 H52 N8 O9	0.00381057	2.56926	54.7221	21.2987					620.385	6.26071	C18+
C26 H24 N4 S3	0.0444075	4.16141	-4.35535	-18.1244					488.116	2.85453	HILIC+
C26 H16 N8 O S	0.0485734	-1.31321	-3.07083	-2.33842					488.117	2.37468	HILIC+
C26 H14 N8 O2	0.0419886	2.53451	8.91152	3.51607					470.125	2.89252	HILIC+
C26 H Cl O20	0.0416262	-1.03427	-1.15468	-1.11642					667.873	5.48871	HILIC+
C25 H53 N11 O9	0.0282469	-1.0409	1.45328	1.51272					651.403	5.28898	C18+
C25 H49 N5 O9	0.0307804	-1.37537	1.53364	2.10932					563.352	4.66105	HILIC+
C25 H48 N2 O3 S2	0.0262198	3.52728	1.32842	-2.65524					488.31	1.01873	HILIC-
C25 H24 O S2	0.0419886	20.5734	2.3535	-8.74164					404.128	1.94526	HILIC+
C25 H2 Cl3 N O S3	0.0416262	1.01275	1.68299	1.6618					532.836	6.20754	HILIC+
C24 H5 N O17 S2	0.0277331	-4.01275	-1.98404	2.02251					642.902	6.75546	HILIC+
C24 H48 N8 O8	0.00820944	1.05043	1.90714	1.81558					576.359	6.15234	C18+
C24 H29 N O3	0	420.405	420.405	-1					379.215	4.11143	HILIC+
C23 H53 N15 O5 S	0.0324246	-1.43164	1.48941	2.1323					651.408	4.98024	HILIC+
C23 H49 N11 O8	0.0156223	-1.06419	1.54634	1.6456					607.377	5.17564	C18+
C23 H45 N5 O8	0.0330705	-1.46532	1.48309	2.17321					519.326	4.41982	HILIC+
C23 H20 O3	0.0315205	-15.622	-31.9934	-2.04798					344.142	5.67015	C18-
C23 H15 Cl N4 O	0.0094388	-3.62506	-27.5012	-7.5864					398.094	2.05194	HILIC-
C23 H12 O2	8.03374e-06	2.13523	-117.212	-250.273					320.086	0.9565	C18+
C22 H6 Cl N	0.0035524	2.90322	6.72492	2.31636					319.019	2.44673	HILIC-
C22 H42 Cl N O3	0.0444075	-3.33385	-1.33076	2.50522					403.284	1.12986	HILIC+
C22 H35 N9 O3	0.00769928	-4.08777	12.655	51.7308					473.284	5.82731	C18+
C22 H22 Cl N3 O	0.00520838	-2.70612	-4.35766	-1.6103					379.147	2.06509	HILIC+
C21 H45 N11 O	0.0403279	1.06965	1.17921	1.10242					467.381	11.0997	C18+
C21 H42 Cl N S2	0.00147534	-1.04728	17.4635	18.2893					407.245	5.58367	C18+
C20 H29 N O2 S4	0.0416262	-1.70521	-3.74498	-2.1962					443.109	2.07015	HILIC+
C20 H24 N4 O6 S	0.0189167	-1.53882	-1.2972	1.18627					448.142	1.0696	HILIC+
C19 H9 N3 S	0.000973292	-2.03742	-2.90576	-1.4262					311.052	2.06639	HILIC-
C19 H42 N6 O5 S	0.00461719	1.03201	1.70914	1.65613					466.295	5.8274	C18+
C19 H41 N11 O6	0.0306188	-1.32352	1.20659	1.59694					519.325	4.91668	C18+
C19 H39 N O15	0.0277331	-1.02519	-1.21707	-1.18718					521.231	1.06967	HILIC+
C19 H32 N12 O	0.0194767	1.25731	1.8344	1.45899					444.283	5.709	HILIC+
C19 H30 Cl N5	0.0238363	1.75239	23.4566	13.3855					363.219	5.39201	C18+
C19 H21 N7 O2 S4	0.0152238	2.11455	1.39582	-1.51492					507.064	2.86587	HILIC-
C19 H17 N9 O2	0.0348453	-1.94266	1.33778	2.59885					403.151	2.80797	HILIC+
C19 H14 N8 S2	0.0208951	-1.11895	-1.15127	-1.02888					418.078	1.29324	HILIC-
C18 H36 N8 O5	0.00820944	1.036	1.64585	1.58865					444.281	5.75075	C18+
C18 H25 Cl O4 S2	0.00102929	1.37939	-1.73609	-2.39475					404.088	2.67915	HILIC-
C18 H13 Cl N2 O S2	0.012738	-1.80081	-8.48222	-4.71022					372.015	2.06404	HILIC-
C18 H12 N4 O2	1.50949e-05	-8.03932	52.8186	424.626					316.098	0.93446	C18-
C18 H N O21 S	0.0487664	-1.49704	15.3397	22.9642					598.873	6.20734	C18+
C18 Cl N O4 S5	0.0419463	1.04063	2.94757	2.83249					488.809	5.89966	C18+
C17 H6 O4 S4	0.0035524	-1.69454	1.68746	2.85947					401.915	5.53396	HILIC-
C17 H6 Cl3 N3 O3 S4	0.00820944	1.02683	1.80476	1.75761					532.836	6.03187	C18+
C17 H33 N13 S	0.0300674	1.22226	20.3086	16.6156					451.269	5.75045	C18+
C17 H33 N11 O10	0.0104784	1.02828	1.09978	1.06953					551.242	3.23571	C18+
C17 H29 N O6 S4	0.0204352	-2.51893	1.13889	2.86878					471.088	2.86217	HILIC-
C17 H28 N12	0.0112247	1.01627	2.10372	2.07004					400.257	5.38211	HILIC+
C17 H21 N5 O7 S2	0.028904	-3.64088	-7.01857	-1.92771					471.088	2.36841	HILIC-
C17 H20 O9 - 2.6471548	0.00170336	-1.13643	-1.5059	-1.32511					368.112	2.64715	HILIC-
C17 H13 Cl N2 O S	0.0291075	-1.07898	-3.68752	-3.41758					328.043	2.32708	HILIC-
C17 H11 N	5.85204e-05	-8.10376	20.3429	164.854					229.09	1.006	C18+
C16 H8 O6	0.00013703	3.08603	-10.2473	-31.6236					296.033	1.96969	HILIC-
C16 H8 Cl3 N O2 S5	0.0392461	1.03303	2.32459	2.25025					510.822	5.96762	C18+
C16 H42 N16 O6	0.00448052	1.08077	1.97271	1.82529					554.347	6.09403	C18+
C16 H35 N O	0.0238363	13.8032	63.9003	4.62938					257.274	10.9534	C18+
C16 H34 O9	0.0306188	-1.09695	1.21504	1.33285					370.221	4.42798	C18+
C16 H32 N8 O4	0.0118999	1.01345	1.57576	1.55484					400.255	5.58456	C18+
C16 H28 Cl2 O5	0.0262198	-2.67882	1.80009	4.82212					370.133	2.04178	HILIC-
C16 H24 O S4	0.00163262	2.44515	-39.3364	-96.1835					360.071	0.91994	C18+
C16 H23 Cl3	0.031991	1.01798	-16.4851	-16.7815					320.083	0.948647	C18-
C16 H16 N2 O S3	0.0293161	1.19308	1.39424	1.16861					348.042	2.17445	HILIC-
C16 H11 N S	0.000520718	7.98993	-35.5055	-283.686					249.061	3.76914	C18-
C15 H6 N4 O3	0.00088664	2.018	-3.40175	-6.86472					290.044	0.7583	HILIC-
C15 H44 N14 O5 S	0.00820944	1.02856	1.75752	1.70871					532.334	6.03249	C18+
C15 H34 N20 O	0.0409602	1.01129	1.65031	1.63189					510.321	6.09629	HILIC+
C15 H24 N6 O2 S	0.00995581	1.28421	-1.40797	-1.80814					352.168	0.715315	HILIC-
C15 H23 N S4	0	-2.15965	-54.2276	-25.1095					345.071	2.36239	HILIC+
C15 H2 O12 S4	0.0485734	-2.82247	1.17226	3.30867					501.843	3.81998	HILIC+
C15 H18 N4	0.0476679	1.98331	1.03861	-1.90958					254.152	1.12905	HILIC+
C15 H15 N5 S2	0.0154921	-1.83879	-2.62226	-1.42608					329.076	2.07127	HILIC+
C14 H9 N9 O3	0.00209076	4.31771	-17.8035	-76.8705					351.084	0.901023	C18-
C14 H4 Cl3 N O S5	0.00820944	1.03957	1.71688	1.65152					466.796	5.82753	C18+
C14 H30 O8	0.0416262	-6.50589	1.91588	12.4645					326.194	3.1354	HILIC+
C14 H30 O3	0.00087431	-1.89935	-1.63955	1.15846					246.219	1.10664	HILIC+
C14 H27 N O9 S + 2.6028347	0.0416262	-1.19634	-1.21029	-1.01166					385.14	2.60283	HILIC+
C14 H20 N2 O3 S3	0.0300674	1.08905	23.1371	21.2453					360.063	0.907917	C18+
C14 H16 O4 S2	0.000973292	-1.35655	-1.91587	-1.41231					312.048	2.06578	HILIC-
C14 H15 Cl O11 S5	0.00559985	-1.01906	-6.35619	-6.23732					553.889	0.894703	HILIC-
C14 H12 N4 S	0.00394981	-4.53526	13.0248	59.0709					268.079	0.993807	C18-
C13 H40 N14 O4 S	0.0419886	-1.01052	1.60763	1.62455					488.308	5.98466	HILIC+
C13 H35 N7 O	0.04242	1.14849	1.17042	1.0191					305.292	1.08292	HILIC+
C13 H3 Cl2 N3 O7 S4	0.0373397	-1.00355	1.68812	1.69411					510.823	6.09652	HILIC+
C13 H20 N6 O	0.0485734	-1.20183	-1.2555	-1.04465					276.17	10.9355	HILIC+
C13 H2 N2 S4	0.0309118	-1.00027	1.173	1.17331					313.91	0.900913	HILIC-
C13 H12 N2 O S	0.0324507	-1.22953	-1.31835	-1.07225					244.067	1.92943	C18-
C12 H6 N4 S	0.0309118	2.97608	10.7143	3.60015					238.031	2.30711	HILIC-
C12 H5 Cl2 N O6 S5	0.0373397	1.00285	1.68383	1.67905					488.81	5.98466	HILIC+
C12 H4 O S	0.0148635	1.1329	1.11741	-1.01386					195.995	0.964928	HILIC-
C12 H33 N7 O	0.0412984	1.47138	1.94623	1.32273					291.276	1.08945	HILIC+
C12 H3 Cl O2	0.0327931	-5.61981	-26.5372	-4.72208					213.981	0.776865	C18+
C12 H27 N	0.0262977	1.05318	1.1324	1.07522					185.214	6.58613	C18+
C12 H26 O3	0.00912192	1.04765	-1.20958	-1.26722					218.188	9.70227	C18+
C12 H24 O S	0.0476679	2.48629	-3.1565	-7.84797					216.155	1.20626	HILIC+
C12 H23 N O	0.0131051	1.00651	-1.15198	-1.15948					197.178	9.83415	C18+
C12 H22 N2 O2	0.0324246	3.24008	17.4259	5.37824					226.168	2.72608	HILIC+
C12 H17 Cl N2 O	0.0277331	-6.30377	-4.09191	1.54054					240.103	2.80763	HILIC+
C12 Cl3 N S5	0.00820944	1.03392	1.65717	1.6028					422.77	5.67033	C18+
C11 H28 N6 O S3	0.0373397	1.03386	-5.12671	-5.30028					356.149	2.50108	HILIC+
C11 H26 Cl N9 O S	0.0376496	1.94827	-6.66389	-12.9831					367.166	0.721248	HILIC-
C11 H16 O8 S	0.00073373	1.91576	-48.6492	-93.2					308.055	0.89769	C18-
C11 H12 N6 O10	0.0195459	1.2609	1.42273	1.12834					388.06	1.51165	HILIC+
C10 H9 N O11 S3	0.038116	2.32747	2.49012	1.06988					414.933	0.897153	HILIC-
C10 H6 N6 O4 S	0.0485959	-3.79762	11.7756	44.7192					306.018	1.04494	C18-
C10 H4 N2	0.0130089	-8.27703	6.4955	53.7635					152.037	1.24861	C18+
C10 H22 O6	0.0277331	-1.37997	1.17767	1.62515					238.142	2.15056	HILIC+
C10 H21 N O	8.25523e-11	1.02185	-1.82038	-1.86014					171.161	1.15764	HILIC+
C10 H16 Cl N3 O5	0.0142498	-5.41364	9.64882	52.2352					293.079	0.948482	C18-
C10 H14 Cl2 N4 O S2	0.0269035	-2.07008	-26.1582	-12.6363					339.999	0.889595	C18-
C10 H10 S - 3.232281	0.0389946	1.68065	-11.6412	-19.5648					162.05	3.23228	C18-
C10 H Cl2 N O5 S5	0.00820944	1.01337	1.68021	1.65805					444.784	5.75081	C18+
831.2372@0.9823347	6.57526e-08	2.44316	1.69716	-1.43956					831.237	0.982335	HILIC+
760.2156@0.9873446	6.25863e-12	6.46437	4.06991	-1.58833					760.216	0.987345	HILIC+
757.2187@0.9859627	2.17087e-12	2.82925	1.69743	-1.66678					757.219	0.985963	HILIC+
782.4927@1.0015551	0.00022333	-1.23497	-1.67346	-1.35506					782.493	1.00156	HILIC+
157.1431@1.1349385	0.0330705	2.07494	-3.70238	-7.68222					157.143	1.13494	HILIC+
815.6315@1.5044196	0.0350919	-3.21927	-11.4656	-3.56155					815.631	1.50442	HILIC+
521.5891@2.7280626	0.00311096	-1.17275	-1.36049	-1.16008					521.589	2.72806	HILIC+
135.1389@4.045926	0.0037395	-1.17025	-1.07429	1.08932					135.139	4.04593	HILIC+
378.7459@5.2166696	0.0141761	-1.24971	3.54732	4.43313					378.746	5.21667	HILIC+
851.8597@5.4878287	0.0416262	-1.3164	1.04467	1.37521					851.86	5.48783	HILIC+
466.7969@5.8746486	0.0324246	1.02633	1.78654	1.7407					466.797	5.87465	HILIC+
905.2583@0.9780892	0.017393	45.8066	4.38316	-10.4506					905.258	0.978089	HILIC+
834.2354@0.98176414	0.000282776	73.1824	4.51523	-16.2079					834.235	0.981764	HILIC+
85.0249@2.6605244	0	12.2986	-2.78352	-34.2333					85.0249	2.66052	HILIC+
85.9979@0.8765855	0.0131039	1.47797	1.1204	-1.31915					85.9979	0.876586	HILIC-
161.8487@1.1059766	0.0441609	-1.01062	-11.0925	-10.9759					161.849	1.10598	HILIC-
147.945@1.1081139	0.0309118	-1.71727	-12.1113	-7.05269					147.945	1.10811	HILIC-
449.1789@1.1231576	0.0301108	-7.17678	1.62572	11.6674					449.179	1.12316	HILIC-
103.9553@1.1081744	0.0028023	2.09909	-3.57384	-7.50182					103.955	1.10817	HILIC-
106.0238@1.8721322	0.038116	-5.17384	-40.5157	-7.83087					106.024	1.87213	HILIC-
161.9426@1.9665304	0.047723	1.1862	1.47773	1.24577					161.943	1.96653	HILIC-
377.8619@1.1391574	0.0408279	9.91786	4.75127	-2.08741					377.862	1.13916	HILIC-
83.9522@0.77654827	0.0118999	1.19	1.26086	1.05954					83.9522	0.776548	C18+
110.0503@0.93669474	6.95947e-05	-1.08426	-103.443	-95.404					110.05	0.936695	C18+
262.0681@0.9910398	0.0403279	-23.7768	-1.42724	16.6592					262.068	0.99104	C18+
230.0776@2.0545368	0.0129597	5.73472	-11.097	-63.6381					230.078	2.05454	C18+
159.0902@3.0526984	0.0435846	-18.2756	1.21696	22.2406					159.09	3.0527	C18+
400.7572@5.5845118	0.0231009	1.02959	1.56925	1.52415					400.757	5.58451	C18+
620.8873@6.2600923	0.0302694	-1.85763	13.5969	25.2581					620.887	6.26009	C18+
642.3993@6.3099966	0.0164323	-1.81784	18.1413	32.978					642.399	6.31	C18+
358.1004@0.9939624	0.0104784	-6.57519	7.51966	49.4432					358.1	0.993962	C18+
258.0854@1.12424	0.00381057	-14.4284	9.7715	140.987					258.085	1.12424	C18+
176.0322@1.1273508	0.00888095	-6.63612	38.6398	256.418					176.032	1.12735	C18+
94.0057@1.1273631	0.00625475	-10.9631	5.34942	58.6461					94.0057	1.12736	C18+
140.0104@1.1276249	0.00381057	-11.7407	11.5525	135.635					140.01	1.12762	C18+
219.9961@1.1288413	0.0118179	-7.93515	4.82889	38.318					219.996	1.12884	C18+
90.0315@1.248242	0.0131051	-5.72191	10.4468	59.7758					90.0315	1.24824	C18+
118.0263@1.2465209	0.00381057	-5.30256	16.3803	86.8573					118.026	1.24652	C18+
131.9746@0.7633306	0.000520718	-8.66255	-293.825	-33.919					131.975	0.763331	C18-
376.1198@0.942917	0.0116538	7.17233	-7.47852	-53.6384					376.12	0.942917	C18-
74.0362@1.0403643	0.000575963	-16.724	4.87693	81.562					74.0362	1.04036	C18-
116.011@1.1453304	0.00164064	-13.8469	40.2941	557.948					116.011	1.14533	C18-
857.3894@0.8631054	0.0447449	18.1696	4.38361	-4.1449					857.389	0.863105	C18-
334.0656@0.95013905	0.031991	-2.13851	19.719	42.1692					334.066	0.950139	C18-
156.0024@1.0059856	0.000418904	-14.0681	5.87931	82.7105					156.002	1.00599	C18-
145.9744@1.0025921	0.00220316	-7.61046	5.69583	43.3479					145.974	1.00259	C18-
209.9918@1.0441303	0.000733317	-5.74442	18.843	108.242					209.992	1.04413	C18-
72.0211@1.1298172	0.00362267	-7.93876	10.1741	80.7697					72.0211	1.12982	C18-
352.0627@1.1308767	0.00128111	-18.9836	6.77008	128.521					352.063	1.13088	C18-
365.0941@1.1315193	0.000956916	-11.4018	4.93731	56.2944					365.094	1.13152	C18-
360.0489@1.1314901	0.0118109	-5.11968	9.80848	50.2163					360.049	1.13149	C18-
146.0212@1.2781007	0.0471398	-6.63162	6.53746	43.3539					146.021	1.2781	C18-
176.0315@1.2749395	2.78593e-05	-24.3006	9.2513	224.812					176.031	1.27494	C18-
242.0737@2.705026	0.00211263	-9.75474	5.90272	57.5794					242.074	2.70503	C18-
116.0446@2.7177472	0.00570346	-2.10019	34.0533	71.5183					116.045	2.71775	C18-
146.0566@3.0256987	0.000101802	-12.3351	8.23617	101.594					146.057	3.0257	C18-
258.0734@3.0340974	0.000733317	-10.0442	5.0589	50.8124					258.073	3.0341	C18-
132.0253@0.9546758	0.0471398	11.6551	-1.86906	-21.7841					132.025	0.954676	C18-
280.0428@1.030675	0.00079618	-12.4344	6.8436	85.0962					280.043	1.03068	C18-
