# Supplementary material for: Identification of Altered Metabolic Pathways in Plasma and CSF in Mild Cognitive Impairment and Alzheimer’s Disease Using Metabolomics
Source: PLoS One. 2013 May 20;8(5):e63644. doi: 10.1371/journal.pone.0063644 (PMC3658985; doi:10.1371/journal.pone.0063644)
Supplement: Table S3 — Identification and validation of plasma and CSF metabolite standards using UPLC-ToF MS. Compound identification codes: CAS- Chemical Abstracts Service; KEGG- Kyoto Encyclopedia of Genes and Genomes. (XLSX) [file pone.0063644.s003.xlsx]

## Sheet: Sheet1
Supplementary Table 3. Identification and validation of metabolite standards in CSF and plasma using UPLC-ToF MS
Metabolite	Mass (m/z)	Retention Time	Mass Accuracy (±ppm)	CAS ID*	KEGG ID*
Pyruvic acid	88.0159	9.056	1.73	127-17-3	C00022
Alanine	89.048	7.77	-4.11	56-41-7	C00041
Sarcosine	89.0481	8.509	-4.94	107-97-1	C00213
2-Aminoisobutyric acid	103.064	7.592	-2.27	62-57-7	C03665
a-hydroxybutyrate	104.047	1.855	4.57
Serine	105.043	0.84	0.02	56-45-1	C00065
Creatinine	113.059	0.961	-0.11	60-27-5	C00791
Proline	115.063	0.947	-0.05
Fumaric acid	116.011	1.023	-0.36	147-85-3	C00148
Valine	117.079	7.272	-1.99
Succinic acid	118.027	1.967	-0.63	110-15-6	C00042
Threonine	119.059	7.55	-2.81	72-19-5	C00188
Niacin (Nicotinic acid)	123.032	1.478	1.59
Taurine	125.015	5.827	-2.47	107-35-7	C00245
N-Methylhistamine	125.095	9.789	1.33	673-50-7
Pyroglutamic acid	129.043	8.217	-3.1	98-79-3	C01879
Trans-4-Hydroxy-L-proline	131.059	7.748	-2.34
Creatine	131.07	8.527	-2.34	51-35-4
Leucine	131.095	6.877	0.42	61-90-5	C00123
Isoleucine	131.095	7.022	0.44	73-32-5	C00407
Asparagine	132.054	8.238	-3.73
Ornithine	132.09	9.767	-0.81	70-26-8	C00077
Aspartic Acid	133.038	0.846	-0.53
malic acid	134.021	1.022	1.37	56-84-8	C00049
Homocysteine	135.035	9.537	-0.29
Hypoxanthine	136.039	2.492	-1.6	68-94-0	C00262
Ethanolamine phosphate	141.019	9.377	-1.1	68-94-0	C00262
2-Ketoglutaric Acid	146.022	6.502	0.04	328-50-7	C00026
Adipic acid	146.057	1.574	4.23	328-50-7	C00026
Lysine	146.106	9.653	-3.18
Glutamic Acid	147.053	8.773	-0.66	56-86-0	C00025
Methionine	149.052	7.081	-3.02	56-86-0	C00025
Histidine	155.069	0.83	0.48
2-Aminoadipic acid	161.069	0.944	-0.28	542-32-5
Hydroxylysine	162.101	9.832	-2.39	542-32-5
Phenylalanine	165.079	6.713	0.81	63-91-2	C00079
6-Chloroguanine	169.016	7.409	-0.7	63-91-2	C00079
N(pai)-Methyl-L-histidine	169.086	10.227	-2.7	368-16-1	C01152
Arginine	174.112	9.679	0.48
Citrulline	175.095	0.882	0.86
Hippuric acid	179.058	6.832	1.72	372-75-8	C00327
D-Glucose	180.063	2.5723	4.12	343-65-7	C00328
Tyrosine	181.073	1.703	2.91	495-69-2	C01586
4-Pyridoxic acid	183.053	8.345	2.61
Isocitric acid	192.026	1.013	2.49
Citric acid	192.027	1.229	2.11
Lauric acid	200.177	1.088	1.54	320-77-4	C00311
Tryptophan	204.089	5.318	2.59	143-07-7	C02679
Kynurenine	208.085	6.239	-3.29	73-22-3	C00078
Cystathionine	222.069	9.58	-5.17
Carnosine	226.106	0.837	1.77	51146-55-5
Cystine	240.024	9.629	-2.37	305-84-0	C00386
L-Anserine	240.122	10.195	0.99	56-89-3	C00491
Homocystine	268.057	1.024	-5.22	462-10-2	C01817
Hexadecanedioic acid	286.213	0.533	5.34
3-Methylglutarylcarnitine	289.153	1.142	-0.86
3'-Methoxy-E,E-dienoestrol	296.141	6.884	-0.64
D-Homogesterone	296.177	6.174	1.16
4-Hydroxy-desmethylclobazam	302.047	10.237	-2.64
6-Ketoestriol	302.152	8.058	-0.77
1-Naphthyl beta-D-glucuronide	320.09	6.92	-0.6
bicyclo-PGE2	334.215	1.155	-1.71
2,3-Dinor-6,15-diketo-13,14-dihydro-PGF1a	338.173	9.896	-0.95
11-deoxy-11-methylene-15-keto-PGD2	348.228	1.115	6.23
15-keto-PGE2	350.209	1.169	0.94
PGE2	352.224	1.262	2.64
PGG2	368.221	1.375	-4.22
25-azavitamin D3 / 25-azacholecalciferol	385.333	4.739	4.43
Taurallocholic acid	515.293	5.1	-2.18
