# Supplementary material for: Identification of Altered Metabolic Pathways in Plasma and CSF in Mild Cognitive Impairment and Alzheimer’s Disease Using Metabolomics
Source: PLoS One. 2013 May 20;8(5):e63644. doi: 10.1371/journal.pone.0063644 (PMC3658985; doi:10.1371/journal.pone.0063644)
Supplement: Table S4 — Metabolites altered in plasma of MCI vs. CN. Data was generated using unpaired t-test. FC – fold change between indicated groups; MCI – mild cognitive impairment; CN – cognitively normal. Compound identification codes: CAS- Chemical Abstracts Service; KEGG- Kyoto Encyclopedia of Genes and Genomes; HMP- Human Metabolome Project; LMP ID- nonpolar lipid metabolite IDs. (XLSX) [file pone.0063644.s004.xlsx]

## Sheet: Sheet1
Supplementary Table 4. Metabolites altered in plasma of MCI vs. CN.
Compound	p-value (Corr)	Fold Change	Log FC	CAS Number	KEGG ID	HMP ID	LMP ID	Mass	Retention Time	Ionization Mode
(24S)-1alpha,24-dihydroxy-22-oxa-20-epivitamin D3 / (24S)-1alpha,24-dihydroxy-22-oxa-20-epicholecalc	0.00344148	5.60667	2.48714				LMST03020059	418.306	1.07486	HILIC+
Azatadine	0.0344412	4.18152	2.06403	3964-81-6	C07774			290.176	1.12892	HILIC+
GPEtn(20:4(5Z,8Z,11Z,14Z)/20:4(5Z,8Z,11Z,14Z))[U]	1.92715e-05	3.23502	1.69377				LMGP02010040	787.52	5.31675	HILIC+
N-Acetylcadaverine	3.45911e-07	2.79546	1.48309			HMDB02284		144.126	6.25989	HILIC+
Hippuric acid	0.019529	2.3022	1.20301	495-69-2	C01586	HMDB00714		179.059	3.00415	HILIC+
VD 2656	0.0425163	2.25445	1.17278				LMST03020641	482.286	3.51825	HILIC-
a-hydroxyisovalerate	0.0179503	2.17811	1.12308					118.062	2.85619	HILIC-
Hydroxyhydroquinone	0.0137077	2.04322	1.03084	533-73-3				126.031	0.713757	HILIC-
(22R)-1alpha,22,25-trihydroxy-26,27-dimethyl-23,24-tetradehydro-24a-homo-20-epivitamin D3 / (22R)-1a + 1.1406572	0.0211364	1.99849	0.99891				LMST03020454	470.346	1.14066	HILIC+
L-2-Aminoadipic acid	0.0119157	1.96046	0.97119	1118-90-7	C00956			161.069	3.28873	HILIC+
N-Acetylarylamine	0.0357119	1.93669	0.953593	55576-55-1	C02558	HMDB01250		135.067	3.03337	HILIC-
p-Hydroxyaniline	0.0287931	1.89288	0.920584	123-30-8				109.052	0.845	HILIC+
5-oxo-7-decynoic acid	5.59478e-05	1.8039	0.851118					182.097	1.12647	HILIC-
(23R)-1alpha,23,25-trihydroxy-24-oxovitamin D3 / (23R)-1alpha,23,25-trihydroxy-24-oxocholecalciferol	0.0287931	1.72886	0.789819				LMST03020194	446.306	1.17695	HILIC+
GPEtn(18:1(11Z)/18:1(9Z))[U]	0.00200026	1.68277	0.750835				LMGP02010034	765.53	2.41672	HILIC+
Ala Leu	0.0384143	1.6529	0.725001					202.132	1.24091	C18+
Estradiol valerate	1.15759e-08	1.62833	0.703389	69557-95-5	C12859		LMST02010039	356.233	5.07906	HILIC+
Trp Ala Ile	0.0208085	1.6043	0.681943					388.212	1.24485	HILIC+
Phenylalanine	0.00241222	1.60153	0.679451		C00079	HMDB00159		165.079	1.24688	C18+
1,3-DIPROPYL-8-CYCLOPENTYLXANTHINE [DPCPX]	0.032046	1.60002	0.678089	102146-07-6				304.19	5.41082	HILIC+
1-Hydroxyvitamin D3 3-D-glucopyranoside	0.000162523	1.55227	0.634378				LMST03020671	576.365	6.40449	HILIC+
Diacetyl	0.000327238	1.54138	0.624223	431-03-8	C00741	HMDB03407		86.0368	2.81176	HILIC-
Diaminopimelic acid	0.0143297	1.52375	0.607623		C00666	HMDB01370		190.093	0.903883	C18+
N4-Acetylsulfapyridine	0.0319761	1.5219	0.605876					291.07	4.34174	C18-
(23R,25R)-1alpha,25-dihydroxyvitamin D3 26,23-lactone / (23R,25R)-1alpha,25-dihydroxycholecalciferol	0.000639968	1.51672	0.600952				LMST03020122	444.286	5.69863	HILIC+
1alpha,25-dihydroxy-11beta-phenylvitamin D3 / 1alpha,25-dihydroxy-11beta-phenylcholecalciferol	0.0147615	1.51264	0.597066				LMST03020529	492.361	1.14711	HILIC+
epsilon-Caprolactam	0.0184224	1.49216	0.577402	105-60-2				113.084	6.23625	HILIC+
N-arachidonoyl D-serine	0.0419487	1.48741	0.572805				LMFA08020004	391.273	9.2992	C18+
Purine	0.0170333	1.46702	0.552893	120-73-0	C00465	HMDB01366		120.044	5.64265	HILIC-
3alpha,6alpha,12alpha-Trihydroxy-7-oxo-5beta-cholan-24-oic Acid	0.000232697	1.4541	0.540126					422.268	5.65823	C18+
Phe Val Val	0.0271583	1.43832	0.524389					363.219	5.37883	C18+
GPSer(16:0/18:1(11Z))	0.0050525	1.36214	0.445875				LMGP03010007	783.494	5.38183	HILIC+
1alpha,25-dihydroxy-3-deoxy-3-thiavitamin D3 / 1alpha,25-dihydroxy-3-deoxy-3-thiacholecalciferol	0.00150162	1.36137	0.445054				LMST03020041	418.29	1.13583	HILIC+
Glucosamine	0.0302274	1.34803	0.430849	3416-24-8	C00329	HMDB01514		179.08	2.73386	HILIC+
Thr Ser Gln	0.0413094	1.31605	0.396213					334.148	5.82163	HILIC-
Ophiobolin A	0.0340642	1.315	0.395064		C09145		LMPR01050002	400.259	5.37685	HILIC+
1alpha,25-dihydroxy-22-oxavitamin D3 3-hemiglutarate/ 1alpha,25-dihydroxy-22-oxacholecalciferol 3-he	0.000649262	1.30468	0.383697				LMST03020492	532.339	6.18732	HILIC+
Glu Ser + 1.2297873	0.012155	1.27493	0.350423					234.086	1.22979	C18+
QUERCETIN TETRAMETHYL (5,7,3',4') ETHER	0.0283445	1.23707	0.306927	1245-15-4				358.105	2.03154	HILIC+
Visnagin	0.0474418	1.19845	0.261174		C09049		LMPK02000029	230.058	0.797953	C18+
clavulone I - 10.898006	0.0489535	1.1414	0.190799				LMFA03120001	446.232	10.898	C18-
Loroxanthin ester/ Loroxanthin dodecenoate	0.00828835	-1.15112	-0.203034				LMPR01070157	764.574	5.11909	HILIC+
Penicillin G	0.0406939	-1.20083	-0.264033	61-33-6	C05551			334.101	1.62634	HILIC-
Ala Thr Pro	0.0063264	-1.21586	-0.281974					287.148	1.20139	C18+
Isoquinoline	0.000807991	-1.22405	-0.291659					151.04	1.25606	C18+
5-NITRO-2-PHENYLPROPYLAMINOBENZOIC ACID [NPPB] + 1.8134243	0.00875059	-1.25753	-0.330592	107254-86-4	C13705			300.114	1.81342	HILIC+
20-oxo-heneicosanoic acid	0.0147615	-1.26779	-0.342313					340.298	1.06881	HILIC+
Arginine	0.0439816	-1.27745	-0.353266	74-79-3	C00062			174.112	8.33826	HILIC+
Indole-3-ethanol	0.00661407	-1.2781	-0.354004	526-55-6	C00955	HMDB03447		183.067	5.10846	HILIC+
Ile Ser Lys	0.0310827	-1.30058	-0.379154					346.221	0.987451	HILIC+
5H-Oxireno[4,5]furo[3,2-g][1]benzopyran-5-one, 1a,8b-dihydro-3-methoxy-	0.0135408	-1.31332	-0.39322					232.039	1.04276	C18-
Creatinine	0.0147619	-1.31456	-0.394575	60-27-5	C00791	HMDB00562		113.059	2.40725	HILIC+
Dimethylglycine	0.0283937	-1.31874	-0.39916	1118-68-9	C01026	HMDB00092		103.063	6.21302	HILIC+
GlcAbeta-Cer(d18:1/18:0)	0.0177975	-1.33626	-0.418198					741.574	5.05972	HILIC+
PYROGALLIN	0.039613	-1.36543	-0.449359	18483-80-2				204.042	1.96525	HILIC-
4,7,10,13,16-docosapentaenoic acid	0.00505405	-1.36793	-0.451993					330.258	0.892171	HILIC+
1-Phenyl-2-(diethylamino)-1-propanol	0.0346278	-1.37363	-0.457998	18259-38-6				207.163	1.10244	HILIC+
4-Hydroxybenzyl cyanide	0.0202179	-1.3853	-0.470196	14191-95-8				155.035	6.59952	HILIC+
GPEtn(O-16:0/22:5(4Z,7Z,10Z,13Z,16Z))	0.0139117	-1.39553	-0.480812				LMGP02020006	811.569	4.99876	HILIC-
EMODIC ACID - 4.837887	0.0446491	-1.4085	-0.494163					300.026	4.83789	C18-
N-methyl-Gabapentin	0.000725	-1.43377	-0.51981	102937-74-6				185.142	1.20524	HILIC+
1-octadecanoyl-rac-glycerol	0.0407861	-1.43456	-0.520608					358.311	1.07046	HILIC+
Traumatic acid	0.00292104	-1.4398	-0.525867		C16308	HMDB00933	LMFA01170002	228.136	7.1679	C18+
Acetamide	0.0319118	-1.44145	-0.527518	60-35-5				59.037	0.890293	HILIC+
PTERIN-6-CARBOXYLIC ACID	0.0200911	-1.45625	-0.542262					207.041	0.876022	C18+
Asp Asn Glu	0.0357119	-1.46396	-0.549881					376.123	5.18991	HILIC-
1-eicosanoyl-rac-glycerol	0.00786129	-1.47327	-0.559021					386.339	13.4631	C18+
glyceraldehyde	0.0147867	-1.47748	-0.563139	56-82-6	C02154	HMDB01051		90.0315	5.13337	HILIC-
TEGASEROD	0.0418809	-1.49269	-0.577911	145158-71-0				301.19	7.09571	HILIC+
3,6-octadecadiynoic acid	0.0256187	-1.50617	-0.590886					276.207	13.2524	C18+
9,12-dioxo-dodecanoic acid	0.0242706	-1.56726	-0.648248					228.135	1.25524	HILIC-
KARANJIN	0.0460496	-1.57565	-0.655947	521-88-0				278.058	0.716645	HILIC-
Acenocoumarol	0.00745952	-1.59463	-0.673224	152-72-7				353.091	0.746335	HILIC-
Ritodrine glucuronide	0	-1.59678	-0.675166					463.181	6.10438	C18-
5-(hydroxymethyl)- 2-Furancarboxylic acid	0.00661407	-1.60582	-0.683308	6338-41-6		HMDB02432		142.026	5.27085	HILIC+
BEPRIDIL	0.0150889	-1.62336	-0.698981	74764-40-2				366.267	1.0804	HILIC-
4-Pyridoxic acid	0.0058542	-1.66492	-0.73545	82-82-6	C00847	HMDB00017		183.054	2.8116	HILIC+
5-octadecylenic acid	0.00149236	-1.67674	-0.745656				LMFA01030065	282.254	1.9779	HILIC-
7,12-Dioxo-5beta-cholan-24-oic Acid	0.013026	-1.69591	-0.76206					388.264	1.06982	HILIC+
Rimiterol	0.0150889	-1.70483	-0.769628	32953-89-2				223.12	2.3007	HILIC-
N'-5Z,8Z,11Z,14Z-eicosatetraenoyl-N''-diethyl-ethylenediamine	0.00237902	-1.73201	-0.792446					424.35	1.09656	HILIC+
Acetoacetic acid	0.0357119	-1.73946	-0.798641	541-50-4	C00164	HMDB00060	LMFA01060003	102.031	1.09447	HILIC-
3beta,4beta-Dihydroxy-5beta-cholan-24-oic Acid	0.0357119	-1.74954	-0.806977					392.291	1.07263	HILIC-
Indoleacrylic acid	0.0461377	-1.77195	-0.825337	1204-06-4	C00331	HMDB00734		187.064	5.43321	HILIC+
4-dodecynoic acid	0.0227811	-1.77443	-0.827359					196.145	1.07787	HILIC-
Acetoin	7.96794e-05	-1.83742	-0.877685	513-86-0	C00810	HMDB03243		88.0517	1.78535	HILIC-
4-undecynoic acid	0.0147619	-1.84631	-0.884648					182.131	1.20682	HILIC+
5beta-Androstan-3alpha-ol-17-one sulfate - 7.384574	0.0132833	-1.86789	-0.901413					370.179	7.38457	C18-
Testosterone sulfate	0.0357119	-1.91826	-0.939797	651-45-6	C00535	HMDB02833		368.165	0.874317	HILIC-
Leu Glu Gln	0.0179817	-1.92024	-0.941283					388.193	1.0958	HILIC-
N(pai)-Methyl-L-histidine	0.00165203	-1.92335	-0.943621		C01152			169.084	0.846569	C18-
Met Trp Gln	0.000397546	-1.93681	-0.953686					463.188	5.03008	HILIC+
Urocanic acid	0.00129591	-1.94467	-0.959522	104-98-3	C00785	HMDB00301		138.043	1.67299	HILIC+
Anandamide (20:2, n-6)	0.0108265	-1.95989	-0.970776				LMFA08040002	351.315	1.1215	HILIC+
27-nor-5b-cholestane-3a,7a,12a,24,25-pentol	0.00376858	-1.98137	-0.986496	78648-95-0		HMDB02126		438.334	1.0713	HILIC-
6-hydroxy-2-hexynoic acid	6.28661e-05	-1.98454	-0.988804					128.047	1.31725	HILIC-
8R-hydroxy-9Z-octadecenoic acid	0.032046	-2.00924	-1.00665					298.252	1.10034	HILIC+
1-Aminocyclohexanecarboxylic acid	0.0269605	-2.06308	-1.0448			HMDB02279		143.095	1.02106	C18+
guaifenesin	3.064e-05	-2.09203	-1.0649			HMDB04998		198.089	5.45521	C18-
5,7-nonadienoic acid	5.64496e-06	-2.12828	-1.08969					154.098	1.29062	HILIC-
Biliverdin IX	0.0070909	-2.27829	-1.18795	114-25-0	C00500	HMDB02309		582.25	1.40454	HILIC+
Queuine	2.81398e-06	-2.37992	-1.25091		C01449	HMDB01495		277.116	1.11118	C18+
2-Methylbutyrylglycine	0.0187814	-2.47285	-1.30618	52320-67-9		HMDB00339		159.09	6.55588	HILIC+
Bilirubin	0.00690457	-2.54508	-1.34771	635-65-4	C00486	HMDB00054		584.266	1.13294	HILIC+
Propionylglycine methyl ester	0.00273992	-2.70094	-1.43346			HMDB00813		145.074	3.16365	HILIC+
1beta,25-dihydroxy-2beta-(3-hydroxypropoxy)vitamin D3 / 1beta,25-dihydroxy-2beta-(3-hydroxypropoxy)c	0.000477238	-2.7536	-1.46132				LMST03020478	490.367	1.08676	HILIC+
(22S)-1alpha,22,25-trihydroxy-23,24-tetradehydro-24a,24b-dihomo-20-epivitamin D3 / (22S)-1alpha,22,2	0.00351567	-3.04361	-1.60578				LMST03020400	456.321	13.6027	C18-
(17Z)-1alpha,25-dihydroxy-26,27-dimethyl-17,20,22,22,23,23-hexadehydrovitamin D3 / (17Z)-1alpha,25-d	0.000910154	-3.07832	-1.62214				LMST03020391	438.314	13.6176	C18+
GPA(21:0/22:6(4Z,7Z,10Z,13Z,16Z,19Z))	0.00505405	-3.14506	-1.65309				LMGP10010004	807.585	5.06467	HILIC+
