# Supplementary material for: Identification of Altered Metabolic Pathways in Plasma and CSF in Mild Cognitive Impairment and Alzheimer’s Disease Using Metabolomics
Source: PLoS One. 2013 May 20;8(5):e63644. doi: 10.1371/journal.pone.0063644 (PMC3658985; doi:10.1371/journal.pone.0063644)
Supplement: Table S7 — Metabolites altered in CSF of AD vs. CN. Data was generated using unpaired t-test. FC – fold change between indicated groups; AD – Alzheimer’s Dsiease; CN – cognitively normal. Compound identification codes: CAS- Chemical Abstracts Service; KEGG- Kyoto Encyclopedia of Genes and Genomes; HMP- Human Metabolome Project; LMP ID- nonpolar lipid metabolite IDs. (XLSX) [file pone.0063644.s007.xlsx]

## Sheet: Sheet1
Supplementary Table 7. Altered metabolites in CSF of AD vs. CN
Compound	p (Corr)	FC	Log FC	CAS Number	HMP ID	KEGG ID	LMP ID	Mass	Retention Time	Ionization Mode
Succinic anhydride	0.00816656	3.66884	1.87533	108-30-5				100.015	1.02877	C18-
ARECOLINE	0.0449375	2.16592	1.11498	300-08-3		C10129		155.094	1.48099	HILIC+
Ne-Methyl-L-lysine	0.00783618	2.01156	1.00832	7622-29-9		C02728		182.105	2.87762	HILIC+
Dehydroascorbic acid	0.0409487	2.0004	1.00028	490-83-5	HMDB01264	C00425		174.016	1.69445	HILIC-
Citraconic acid	0.0491199	1.94277	0.958112	498-23-7	HMDB00634	C02226		130.026	1.02854	C18-
Pyruvic acid	0.0348129	1.9362	0.953232	127-17-3	HMDB00243	C00022	LMFA01060077	88.0158	1.00262	C18-
2-Aminopropanol	0.0470807	1.76627	0.820703	6168-72-5				75.0686	0.949472	C18+
N,N-Didemethylchlorpromazine	0.0443365	1.76226	0.817431	2095-17-2				290.063	2.92953	HILIC+
threo-Isocitric acid	0.0460702	1.73155	0.792067		HMDB01874			192.025	2.02586	HILIC-
Pro Pro	0.00914676	1.67011	0.739942					212.115	2.16358	HILIC+
Propanoic acid, 2-hydroxy-3-[(4-hydroxy-1-naphthalenyl)oxy]-	0.00210165	1.66492	0.735449	96848-85-0				278.079	2.37291	HILIC-
ETHOPROPAZINE	0.00347912	1.63446	0.708814	1094-08-2		D03276		312.169	1.1095	HILIC-
3alpha,6alpha,12alpha-Trihydroxy-7-oxo-5beta-cholan-24-oic Acid	0.0120509	1.62708	0.702287					422.268	5.67016	C18+
2-ISOPROPYL-3-METHOXYCINNAMIC ACID	0.00545009	1.62001	0.696005					220.109	1.05531	HILIC-
2-Pyrrolidinone	0.031223	1.61085	0.687822	616-45-5	HMDB02039	C11118		85.0529	1.79215	HILIC+
Bifemelane (M4)	0.000273001	1.59338	0.67209	101948-33-8				308.104	1.24392	C18+
Vigabatrin	0.00836981	1.58007	0.659988	68506-86-5		C07500		129.079	3.97348	HILIC+
Granisetron metabolite 1	0.0299816	1.56804	0.648958					344.183	1.21579	HILIC+
L-gamma-Cyano-gamma-aminobutyric acid	0.0444577	1.55889	0.640521	31883-84-8				128.058	2.66554	C18+
N-gamma-Acetyl-N-2-formyl-5-methoxykynurenamine	0.0367376	1.50594	0.59066	52450-38-1				264.108	4.35326	C18-
2-Methyl-3-ketovaleric acid	0.0269844	1.50578	0.59051	14925-93-0	HMDB00408			130.062	3.94065	C18-
3-(a-Naphthoxy)lactic acid	0.0445969	1.49143	0.576699	10476-54-7				232.072	1.29517	C18-
Phenol	0.00114258	1.48082	0.566396	108-95-2	HMDB00228	C00146		94.0413	3.89494	C18-
MYCOPHENOLIC ACID	0.0135935	1.45371	0.53974	24280-93-1				320.125	1.36076	HILIC+
Promazine	0.0261681	1.43519	0.521245	58-40-2		C07379		306.116	6.13442	HILIC+
clavirin I	0.00638137	1.4347	0.520748				LMFA03120025	290.152	0.900338	C18+
COTARNINE	0	1.43418	0.520229	10018-19-6				237.1	1.96824	HILIC-
(24S)-1alpha,24-dihydroxy-22-oxavitamin D3 / (24S)-1alpha,24-dihydroxy-22-oxacholecalciferol + 2.8750935	0.00625608	1.4305	0.516515				LMST03020058	418.308	2.87509	HILIC+
L-Alanine n-butyl ester	0.00548153	1.42934	0.515349	359-79-8				145.109	1.00519	C18+
L-Glutamic acid dibutyl ester	0.0248887	1.42272	0.508651	4261-76-1				259.178	5.3399	C18+
beta-D-Glucopyranosiduronic acid, 2-(1H-indol-4-yloxy)-1-[[(1-methylethyl)amino]methyl]ethyl - 10.241287	0.0348129	1.41994	0.505826	93860-29-8				424.187	10.2413	C18-
8-Amino Caprylic acid	0.0471207	1.4151	0.500905	1002-57-9				159.126	6.69221	HILIC+
Mebeverine	0.00130733	1.41081	0.496522	630-20-3				429.256	5.66824	C18+
Tyr Tyr Thr	0.000372083	1.40797	0.49362					445.188	1.19977	HILIC+
5-Hydroxytryptophan	0.0111898	1.40439	0.489939	895-09-6				220.083	3.2635	C18+
Isoacitretin	0.0220332	1.39417	0.479404	69427-46-9	HMDB03039			326.189	1.11682	HILIC-
L-DOPA	0.0144984	1.37337	0.457722	59-92-7	HMDB00181	C00355		219.051	1.58739	HILIC+
bicyclo-PGE2	0.0174547	1.36578	0.449721				LMFA03010034	334.216	5.28963	C18+
Glucosylceramide (d18:1/20:0)	0.0174547	1.36572	0.449657	85305-87-9	HMDB04973	C01190		777.615	0.839289	C18+
GPEtn(13:0/15:0)[U]	0.00769079	1.3617	0.445412				LMGP02010060	652.481	1.08209	HILIC+
D-Leucic acid	0.0368047	1.34174	0.424103	20312-37-2	HMDB00624	C03264		132.078	2.14706	HILIC+
4-Hydroxytacrine	0.000776003	1.34059	0.42287	130073-99-3				214.108	4.8964	C18-
HAEMATOXYLIN	0.00914676	1.31921	0.399673	517-28-2				302.081	2.04873	HILIC+
Lecanoric acid	0.017566	1.30028	0.378826	480-56-8		C02868	LMPK02000008	318.072	2.44127	HILIC-
8,13-dihydroxy-9,11-octadecadienoic acid	0.0433567	1.28262	0.359092					329.253	14.1352	C18+
4'-Hydroxyminoxidil	0.047236	1.27734	0.353148	56828-37-6				247.105	1.10334	C18+
Acyclovir	0.042365	1.26957	0.344339	59277-89-3		C06810		225.088	1.24823	C18+
Adriamycinone	0.00210165	1.26742	0.3419	24385-10-2				414.098	2.04123	HILIC-
Taurine	0.0288146	1.24045	0.310869	107-35-7	HMDB00251	C00245		125.015	0.85459	C18-
N2,N2-Dimethylguanosine	0.0294506	1.20737	0.271871	2140-67-2	HMDB04824			311.123	3.40021	C18+
Ala Phe Arg	0.0137772	1.19798	0.260603					392.217	14.144	C18-
Estrone sulfate	0.0474596	1.19599	0.258201	481-97-0	HMDB01425	C02538		350.12	2.03685	HILIC+
5-[2-(hydroxymethyl)-5-methylphenoxy]-2,2-dimethyl-Pentanoic acid (Gemfibrozil M4)	0.0478872	1.16312	0.217996	80373-14-4				266.154	1.97253	HILIC-
Gln Pro Lys	0.0151405	1.15085	0.2027					371.216	4.82522	C18+
Glycolate	0.017566	1.14903	0.200419	666-14-8				76.016	1.97174	HILIC-
2,4-DINITROPHENOL	0.0159929	1.12365	0.16819	51-28-5				184.011	6.67439	C18-
Cyclopenthiazide	0.0100189	1.09854	0.135589	742-20-1				379.041	2.88959	HILIC+
3-oxo-dodecanoic acid	0.0128573	1.08454	0.117084					214.159	0.90156	HILIC-
dihydroxyacetone phosphate (DHAP)	0.00618175	1.07447	0.103624	57-04-5		C00111		169.997	0.895219	HILIC-
Phenoperidine	0.0110828	1.05273	0.0741392	562-26-5				367.214	11.0301	C18+
3-Amino-2-piperidone	0.0262846	1.04768	0.067198	1892-22-4	HMDB00323			136.061	3.23598	C18+
Met Glu Lys	0.020622	-1.10937	-0.149741					406.19	8.97651	C18-
1-heptadecanoyl-2-(9Z-heptadecenoyl)-3-eicosanoyl-sn-glycerol	0.04017	-1.11537	-0.157522					905.836	5.48834	HILIC+
N1-Acetylspermidine	0.0471207	-1.1387	-0.187385	14278-49-0	HMDB01276	C00612		187.168	8.66738	HILIC+
Pyrrole-2-carboxylic acid	0.0349897	-1.1389	-0.187646	634-97-9	HMDB04230	C05942		111.032	1.62907	HILIC-
Catalpol	0.0402027	-1.1522	-0.204396			C09773	LMPR01020108	362.119	2.05658	HILIC-
Lactaldehyde	0.0175496	-1.16054	-0.214801	598-35-6	HMDB03052	C00424		74.0365	1.39526	HILIC-
MERBROMIN	0.0267188	-1.17665	-0.23468	129-16-8				759.871	5.4863	HILIC-
a-hydroxybutyrate	0.00848539	-1.18807	-0.248622					104.047	1.39599	HILIC-
VALERYL SALYCILATE	0.0188593	-1.20058	-0.263729	64206-54-8				222.09	1.04697	HILIC+
Imidazolone	0.0460702	-1.21881	-0.285471		HMDB04363	C06195		84.0319	0.847063	HILIC-
Pro Lys Pro	0.0159929	-1.22295	-0.290367					340.21	13.0825	C18-
Creatine	0.00659227	-1.22874	-0.297182	6020-87-7	HMDB00064	C00300		131.069	6.94461	HILIC-
1a,1b-dihomo-PGJ2	0.0474596	-1.25897	-0.332249				LMFA03010158	362.246	1.03022	HILIC+
(R)-3-Methyl-2-oxobutanoate	0.0110058	-1.26088	-0.33443		HMDB04260			175.062	3.76955	C18-
Creatinine	0.0476417	-1.26698	-0.341392	60-27-5	HMDB00562	C00791		135.041	6.95482	HILIC+
Pyroglutamic acid	0.0355489	-1.26724	-0.341694	98-79-3	HMDB00267	C01879		129.042	5.84076	HILIC-
Bis (2-hydroxypropyl) amine	0.000296248	-1.27762	-0.353461	110-97-4				133.11	4.87221	HILIC+
9(S)-HODE-d4	0.00701689	-1.28996	-0.36733				LMFA01050353	300.262	1.0738	HILIC-
Thr Gly	0.00341733	-1.29257	-0.37024					222.087	1.17956	HILIC-
Asp Glu	0.00299341	-1.31059	-0.390216					262.08	2.03615	HILIC-
BENZANTHRONE	0.0204265	-1.32085	-0.401469	82-05-3				230.076	2.67848	C18-
TUBAIC ACID	0.0109493	-1.3232	-0.404035	25277-45-6				220.074	1.96088	HILIC-
BERGENIN	0.00132929	-1.32719	-0.408373	477-90-7				328.08	2.07197	HILIC+
Glu Ser	0.012138	-1.33114	-0.41266					234.086	1.96535	HILIC-
Lactate	0.0382577	-1.34179	-0.424163	113-21-3				90.0314	5.73574	HILIC-
(R)-(+)-Citronellal	0.000679471	-1.34277	-0.42521			C09848	LMPR01020055	171.162	8.9476	C18+
beta-Alanine	0.00953163	-1.34876	-0.431639	107-95-9		C00099		89.0474	6.93982	HILIC-
Sedoheptulose	0.0460702	-1.35909	-0.442638	3019-74-7	HMDB03219	C02076		210.072	2.96879	HILIC-
Benzaldehyde, p-amino-, thiosemicarbazone	0.0492627	-1.3635	-0.447313	6957-91-1				240.068	1.05362	HILIC-
4-Guanidinobutanoate	0.0479218	-1.36528	-0.449199	463-00-3	HMDB03464	C01035		145.085	6.09473	HILIC+
4-Aminophenyl 1-thio-beta-D-glucuronide + 2.5971124	0.0105924	-1.38096	-0.465667	62205-44-1				301.064	2.59711	HILIC+
cysteine	0.00135678	-1.38834	-0.473359	3374-22-9				167.025	1.01008	C18-
Terephthalic acid	0.00962442	-1.39228	-0.47745	100-21-0	HMDB02428	C06337		166.023	1.01884	HILIC-
EPICATECHIN PENTAACETATE	2.7149e-07	-1.40592	-0.49151					500.131	2.07001	HILIC+
beta-vinyl acrylic acid	0.0152193	-1.42321	-0.509148				LMFA01030099	98.0367	2.32516	HILIC+
Clonidine Metabolite 3	0.00223804	-1.42687	-0.512849					273.006	1.39626	HILIC-
Allocortol	0.00017999	-1.44056	-0.526628	1169-36-4				368.257	1.15188	HILIC+
N1,N4-Diacetylsulfanilamide	0.0168261	-1.45256	-0.538595	5626-90-4				256.052	1.08828	HILIC+
Cys Cys Tyr	0.0326659	-1.4616	-0.547551					387.09	1.62931	HILIC-
dodecanamide	8.13455e-07	-1.46847	-0.554311					199.193	1.13582	HILIC+
1-(7Z,10Z,13Z,16Z-docosatetraenoyl)-2-(7Z,10Z,13Z,16Z,19Z-docosapentaenoyl)-sn-glycerol	0.0201866	-1.48716	-0.57256					718.552	1.0766	HILIC+
2,5-Dimethoxycinnamic acid	0.0109105	-1.49286	-0.57808	10538-51-9	HMDB02370			208.074	2.0519	HILIC-
20alpha-Dihydroprednisolone	0.002593	-1.50132	-0.586236	15847-24-2				362.212	2.0537	HILIC+
1,3-Glyceryl dinitrate	0.00801873	-1.51269	-0.597116	623-87-0				242.037	2.83861	HILIC-
O-Desmethylnaproxen	0.00248647	-1.51509	-0.599403	52079-10-4				216.08	1.39672	HILIC-
Allantoin	0.0141366	-1.51929	-0.603395	97-59-6	HMDB00462	C01551		158.043	2.10889	HILIC-
10-hydroxy-8E-Decene-2,4,6-triynoic acid	2.15593e-06	-1.52039	-0.60444					176.048	1.05172	HILIC+
Octane	0.0222167	-1.52089	-0.604915	111-65-9	HMDB01485	C01387		131.166	6.95305	HILIC+
Erythrono-1,4-lactone	0.0029221	-1.54076	-0.623641	17675-99-9	HMDB00349			118.027	1.87678	HILIC-
Fumaric acid	0.0391702	-1.55236	-0.634462	110-17-8	HMDB00134	C00122		116.01	1.00541	HILIC-
3-(Imidazol-4-yl)-2-oxopropyl phosphate	0.00876809	-1.55687	-0.63865	99979-59-6		C01267		280.046	1.92283	C18-
Alfentanil	0.00891736	-1.56652	-0.647564	71195-58-9				416.253	1.06601	HILIC-
3-Hydroxyphenytoin	0.00860005	-1.56956	-0.650358	30074-03-4				268.084	0.711914	HILIC-
1-Hexadecylamine	0.0232495	-1.57737	-0.657519	143-27-1				241.277	2.76476	HILIC+
Pirenzepine	0.00137222	-1.58336	-0.662993	28797-61-7		C07508		351.171	0.715264	HILIC-
Arg Cys Cys	0.000837318	-1.58893	-0.668052					380.129	2.05388	HILIC-
Oxazepam	0.00858094	-1.59044	-0.669428	604-75-1		C07359		286.052	3.28403	HILIC-
Met Ala His	0.00535776	-1.61203	-0.688882					357.145	2.50426	HILIC+
2-Naphthaleneacetic acid, 6-hydroxy	0.0151902	-1.61259	-0.689381	10441-46-0				202.064	3.22001	HILIC-
Methylglyoxal	0.0178687	-1.62077	-0.696681	78-98-8		C00546		72.0208	1.00745	HILIC-
Gummiferol	0.00747754	-1.62423	-0.699759				LMFA05000014	286.085	0.955995	C18-
CITROPTEN	0.00966371	-1.64237	-0.715778	487-06-9				206.059	2.34727	HILIC-
Ethosuximide	0.00779438	-1.66075	-0.731834	77-67-8				141.078	2.08785	HILIC+
4-Hydroxypyridine	0.0323148	-1.6612	-0.732222	626-64-2				95.0368	1.29957	C18+
Pyrimethamine	2.18924e-05	-1.66751	-0.737699	58-14-0		C07391		248.082	1.96478	HILIC-
O-BENZYL-l-SERINE	0.00238636	-1.67934	-0.747893	4726-96-9				195.089	1.04204	HILIC-
(22E,24E,26E)-1alpha,26b-dihydroxy-22,23,24,25,26,26a-hexadehydro-26a,26b-dihomo-27-norvitamin D3 /	0.0294415	-1.69274	-0.759358				LMST03020312	424.296	1.04606	HILIC+
B-ureidoisobutyric acid	0.012138	-1.69417	-0.76058	2905-86-4				146.069	6.83409	HILIC-
AMBELLINE	0.0181461	-1.69487	-0.761177	3660-62-6				331.144	2.06794	HILIC+
ANISOMYCIN	0.00548153	-1.71319	-0.776686	22862-76-6				265.132	4.45806	C18+
Deoxyadenosine	0	-1.73259	-0.792932	958-09-8	HMDB00101	C00559		251.104	2.07105	HILIC+
Acetoin	0.0077024	-1.74219	-0.800899	513-86-0	HMDB03243	C00810		88.0516	1.71861	HILIC-
N-Acetyl-p-benzoquinonimine	0.0246288	-1.7489	-0.806448	50700-49-7				149.048	1.70378	HILIC+
7E-decen-1-ol	1.73937e-05	-1.78687	-0.837431				LMFA05000043	156.15	1.12731	HILIC-
Dihydrokaempferol	0.00299341	-1.78705	-0.837582	480-20-6		C00974		288.065	3.13162	HILIC-
Gualenate (Sodium Gualenate)	0.012345	-1.8047	-0.851759	16915-32-5				278.097	1.94979	HILIC-
Hydromorphone	3.64075e-05	-1.81227	-0.857799	466-99-9		C07042		285.137	1.12007	HILIC+
Furafylline	0.00342282	-1.82128	-0.864954	80288-49-9				260.092	3.05344	HILIC+
7-hydroxy Tetranor Iloprost	0.00860005	-1.97257	-0.980077	93128-32-6				322.18	1.08735	HILIC-
PGE2alpha dimethyl amine	0.0437699	-2.00099	-1.00071				LMFA03010114	367.308	1.1698	HILIC+
2-Octenedioic acid	0.0308139	-2.03341	-1.0239	5698-50-0	HMDB00341			172.074	1.22251	HILIC+
Acetoacetic acid	0.00693115	-2.03432	-1.02454	541-50-4	HMDB00060	C00164	LMFA01060003	102.031	1.09336	HILIC-
METHYL 7-DESHYDROXYPYROGALLIN-4-CARBOXYLATE	0.000233632	-2.04825	-1.03439	77-41-8				262.05	0.805915	HILIC-
2-Hydroxy-3-(4-methoxyethylphenoxy)-propanoic acid	2.84632e-07	-2.08775	-1.06195	56392-15-5				240.1	1.14737	HILIC-
Anthracene	0.0109425	-2.43136	-1.28176	120-12-7				178.078	3.35716	C18+
PYROGALLIN	6.16936e-11	-2.4525	-1.29425	18483-80-2				204.041	1.97025	HILIC-
1-Hydroxy-2-naphthoic acid	0.000837318	-2.51991	-1.33337	86-48-6				188.049	3.17358	HILIC-
(22R)-1alpha,22,25-trihydroxy-23,24-tetradehydro-24a,24b-dihomo-20-epivitamin D3 / (22R)-1alpha,22,2	0.00226775	-2.70324	-1.43469				LMST03020399	456.322	1.02591	HILIC-
Methoxsalen Metabolite	1.56427e-09	-3.21835	-1.68632					236.067	1.96618	HILIC-
