# Supplementary material for: Identification of Altered Metabolic Pathways in Plasma and CSF in Mild Cognitive Impairment and Alzheimer’s Disease Using Metabolomics
Source: PLoS One. 2013 May 20;8(5):e63644. doi: 10.1371/journal.pone.0063644 (PMC3658985; doi:10.1371/journal.pone.0063644)
Supplement: Table S8 — Altered metabolites in plasma of AD vs. MCI. Data was generated using unpaired t-test. FC – fold change between indicated groups; AD – Alzheimer’s Dsiease; MCI – mild cognitive impairment. Compound identification codes: CAS- Chemical Abstracts Service; KEGG- Kyoto Encyclopedia of Genes and Genomes; HMP- Human Metabolome Project; LMP ID- nonpolar lipid metabolite IDs. (XLSX) [file pone.0063644.s008.xlsx]

## Sheet: Sheet1
Supplementary Table 8. Altered metabolites in plasma of AD vs. MCI.
Compound	p-value (Corr)	Fold Change	Log FC	CAS Number	KEGG ID	HMP ID	LMP ID	Mass	Retention Time	Ionization mode
2-Methylbutyrylglycine	0.000472356	5.57799	2.47974	52320-67-9		HMDB00339		159.09	6.55588	HILIC+
Propionylglycine methyl ester	0.00430554	3.21929	1.68674			HMDB00813		145.074	3.16365	HILIC+
3E-undecenoic acid	0.0113688	2.94137	1.55649					184.145	1.13673	HILIC-
1-Aminocyclohexanecarboxylic acid	0.00929121	2.72791	1.44779	2756-85-6		HMDB02279		143.095	1.02106	C18+
L-Urobilin	0.0472438	2.70719	1.43679	34217-90-8	C05793	HMDB04159		594.345	1.46342	HILIC+
2-oxo-4-hydroxy-hexanoic acid	5.90513e-05	2.29234	1.19682		C06762			146.057	1.48252	HILIC-
guaifenesin	0.000111842	2.03051	1.02184	93-14-1		HMDB04998		198.089	5.45521	C18-
5-tert-Butyl-4-hydroxymethylfuran-2-carboxylic acid	0.0387567	1.93975	0.955871	701216-61-7				198.088	1.28654	HILIC-
Gly His	0.00387769	1.89997	0.92598					212.09	1.74506	HILIC-
27-nor-5b-cholestane-3a,7a,12a,24,25-pentol	0.0133767	1.87505	0.90693	78648-95-0		HMDB02126		438.334	1.0713	HILIC-
Isoacitretin	0.0193243	1.87151	0.904205	69427-46-9		HMDB03039		326.19	1.46152	HILIC-
Carbaryl	0.00777686	1.83921	0.879086	63-25-2	C07491			201.079	4.26866	C18+
3,6-octadecadiynoic acid	0.0352169	1.71764	0.78043					276.207	13.2524	C18+
5-Methoxyindoleacetate	0.0459591	1.67044	0.74023	3471-31-6	C05660	HMDB04096		205.073	3.13184	HILIC-
BUFEXAMAC	0.0381164	1.63313	0.70764	2438-72-4	D01272			245.102	1.11728	C18+
5,7-nonadienoic acid	0.0258321	1.62957	0.704494					154.098	1.29062	HILIC-
Arg Asn Gln	0.00567983	1.58963	0.668689					416.213	13.4642	C18-
N-methyl-Gabapentin	0.00210941	1.53781	0.62088	102937-74-6				185.142	1.20524	HILIC+
4-Hydroxybenzyl cyanide	0.0227607	1.53115	0.614617	14191-95-8				155.035	6.59952	HILIC+
N(pai)-Methyl-L-histidine	0.000290258	1.52132	0.605327	368-16-1	C01152			169.085	3.64641	HILIC+
L-gamma-Cyano-gamma-aminobutyric acid	0.0270863	1.51542	0.599718	31883-84-8				128.058	0.924198	C18-
(22R)-1alpha,22,25-trihydroxy-26,27-dimethyl-23,24-tetradehydro-24a-homo-20-epivitamin D3 / (22R)-1a	0.0442356	1.5054	0.590149				LMST03020454	470.34	1.14752	HILIC+
3-Methylindole	0.0134843	1.4692	0.555032	83-34-1	C08313	HMDB00466		131.073	1.28643	HILIC-
Chloramphenicol alcohol	0.0453084	1.46235	0.548285	23885-72-5				270.087	3.21877	HILIC+
Traumatic acid	0.0168353	1.45428	0.540303	6402-36-4	C16308	HMDB00933	LMFA01170002	228.136	7.1679	C18+
13E,17-octadecadienoic acid	0.0027729	1.40369	0.489226					280.24	13.7628	C18+
1alpha,25-dihydroxy-2beta-(5-hydroxypentoxy)vitamin D3 / 1alpha,25-dihydroxy-2beta-(5-hydroxypentoxy	0.0202393	1.25052	0.322525				LMST03020527	518.393	12.6209	C18-
Terephthalic acid	0.00227008	1.23709	0.306945	100-21-0	C06337	HMDB02428		166.027	1.01611	HILIC+
Proline	0.0270863	1.1995	0.262428	147-85-3	C00148	HMDB00162		115.063	0.968529	C18-
10-hydroxy-11-dodecenoic acid	0.00578014	1.15172	0.203786					214.158	0.89833	HILIC-
clavulone I	0.00879032	-1.20226	-0.265749				LMFA03120001	446.232	10.898	C18-
Indoleacrylic acid	0.0381164	-1.22922	-0.297738	1204-06-4	C00331	HMDB00734		187.063	3.64999	C18+
Tryptophan	0.0125953	-1.22991	-0.298548	73-22-3	C00078			204.089	5.52464	HILIC-
Succinic anhydride	0.0400508	-1.23806	-0.308086	108-30-5				100.016	1.85428	HILIC-
Trp Gly Phe	0.0446909	-1.35555	-0.438877					408.18	3.64966	C18+
METHYL 7-DESHYDROXYPYROGALLIN-4-CARBOXYLATE	0.0270863	-1.4138	-0.499579	77-41-8				262.048	3.64647	C18-
1alpha,25-dihydroxy-3-deoxy-3-thiavitamin D3 / 1alpha,25-dihydroxy-3-deoxy-3-thiacholecalciferol	0.0438465	-1.47593	-0.561627				LMST03020041	418.29	1.13583	HILIC+
Asymmetric dimethylarginine	0.000355336	-1.49602	-0.581134	30344-00-4		HMDB03334		202.143	8.5756	HILIC+
5-[2-(hydroxymethyl)-5-methylphenoxy]-2,2-dimethyl-Pentanoic acid (Gemfibrozil M4)	0.0125953	-1.73241	-0.792784	80373-14-4				266.154	0.824767	HILIC-
Urea	0.0381164	-1.97856	-0.984453	57-13-6	C00086	HMDB00294		60.0326	0.72818	C18+
SULBACTAM	0.042166	-2.23304	-1.15901					233.035	1.87747	HILIC-
Ala Leu	0.0168353	-2.27708	-1.18718					202.132	1.24091	C18+
Diglycolic acid	0.000242126	-2.38734	-1.25541			HMDB02317		134.021	1.05656	C18-
4-Pyridoxic acid	0.000128583	-2.53998	-1.34481	82-82-6	C00847	HMDB00017		183.053	2.82088	C18+
