# Supplementary material for: Identification of Altered Metabolic Pathways in Plasma and CSF in Mild Cognitive Impairment and Alzheimer’s Disease Using Metabolomics
Source: PLoS One. 2013 May 20;8(5):e63644. doi: 10.1371/journal.pone.0063644 (PMC3658985; doi:10.1371/journal.pone.0063644)
Supplement: Table S9 — Altered metabolites in CSF of AD vs. MCI. Data was generated using unpaired t-test. FC – fold change between indicated groups; AD – Alzheimer’s Dsiease; MCI – mild cognitive impairment. Compound identification codes: CAS- Chemical Abstracts Service; KEGG- Kyoto Encyclopedia of Genes and Genomes; HMP- Human Metabolome Project; LMP ID- nonpolar lipid metabolite IDs. (XLSX) [file pone.0063644.s009.xlsx]

## Sheet: Sheet1
Supplementary Table 9. Altered metabolites in CSF of AD vs. MCI.
Compound	p (Corr)	FC	CAS Number	KEGG ID	HMP ID	LMP ID	Mass	Retention Time	Ionization Mode
N,N-Didemethylchlorpromazine	0.000115032	3.29483	2095-17-2				290.063	2.92953	HILIC+
2-Methylbutyrylglycine	0.00223687	2.60971	52320-67-9		HMDB00339		159.089	6.56621	HILIC+
Phenol	3.85742e-07	2.00392	108-95-2	C00146	HMDB00228		94.0413	3.89494	C18-
Phenyl sulfate	0.0269766	1.97513	937-34-8				173.997	3.89489	C18-
L-Glutamic acid dibutyl ester	0.0194472	1.95335	4261-76-1				259.178	4.93688	C18+
Isoniazid	0.019415	1.81219	54-85-3	C07054			137.058	1.29366	HILIC+
Ne-Methyl-L-lysine	0.0273587	1.80638	7622-29-9	C02728			182.105	2.87762	HILIC+
Tyr Pro	0.0305456	1.77483					278.129	1.22919	HILIC+
1-Hexadecylamine	0.0392295	1.76429	143-27-1				241.276	3.83124	HILIC+
Pyridoxamine	0.00652694	1.5172	85-87-0	C00534	HMDB01431		168.091	1.85295	HILIC+
Phenylalanine	0.0412199	1.4689	63-91-2	C00079	HMDB00159		182.105	3.11245	C18+
Asn Gly Ser	0.00815039	1.42466					276.112	3.72269	C18+
DALBERGIONE, 4-METHOXY-4'-HYDROXY-	0.0309285	1.4079					270.087	3.24766	HILIC+
S-Succinyldihydrolipoamide	0.00143349	1.36853		C01169	HMDB01177		307.091	0.965342	C18-
Succinic anhydride	0.0134436	1.35576	108-30-5				100.016	1.139	HILIC-
DICHLORODIPHENYLTRICHLOROETHANE	0.0247124	1.35356	50-29-3				205.965	0.801241	C18-
Allocortol	0.0245568	1.33008	1169-36-4				368.257	1.15188	HILIC+
5,7-nonadienoic acid	0.0309285	1.2795					154.1	1.14116	HILIC+
alpha,alpha-Trehalose	0.000734494	1.27679	99-20-7	C01083			364.1	0.933816	C18+
4-Hydroxytacrine	0.0310778	1.2615	130073-99-3				214.108	4.8964	C18-
20alpha-Dihydroprednisolone	0.019415	1.24336	15847-24-2				362.212	2.0537	HILIC+
Methylphenidate	0.022415	1.18718	113-45-1	C07196			233.142	0.907944	C18+
Glycolate	0.00365156	1.18269	666-14-8				76.016	1.97174	HILIC-
Pro Lys Pro	0.0053801	-1.25074					340.21	13.0825	C18-
Isoacitretin	0.0365936	-1.25265	69427-46-9		HMDB03039		326.19	1.30349	HILIC-
1,3-Glyceryl dinitrate	0.0111046	-1.28887	623-87-0				242.037	2.83861	HILIC-
Methoxsalen Metabolite	0.0494097	-1.65014					236.067	1.96618	HILIC-
Tyrosine	0.0296619	-1.97315	60-18-4	C00082	HMDB00158		181.075	1.77599	C18+
Caffeine	0.0296619	-2.0468	58-08-2	C07481	HMDB01847		194.082	4.21381	C18+
Phenytoin-N-glucuronide	0.00617779	-2.08525					428.118	3.68989	C18+
Anthracene	0.000730361	-2.62558	120-12-7				178.078	3.35716	C18+
